1 **Prevalence and Outcome of Adults with Congenital Heart Disease**  
2 **and Coronary Artery Disease**

3 Haiyang Li MD <sup>a,c\*</sup>, Yan Yan MD <sup>b,c\*</sup>, Shipan Wang MD <sup>a,c\*</sup>, Mingyu Sun MD <sup>a,c\*</sup>, Sichong  
4 Qian, MD <sup>a,c</sup>, Yuan Xue, MD <sup>a,c</sup>, Hongjia Zhang, MD <sup>a,c#</sup>

5

6 <sup>a</sup> Department of Cardiac Surgery, Beijing Anzhen Hospital, Capital Medical University,  
7 Beijing, China

8 <sup>b</sup> Center for Coronary Artery Disease, Department of Cardiology, Beijing Anzhen Hospital,  
9 Capital Medical University, Beijing, China

10 <sup>c</sup> National Clinical Research Center for Cardiovascular Diseases, Beijing, China

11

12 \* These authors contributed equally to this study.

13 **#Address for correspondence:**

14 Hongjia Zhang, MD, PhD

15 Beijing Anzhen Hospital, Capital Medical University

16 2 Anzhen Road, Chaoyang District, Beijing, China, 100029

17 Email: zhanghongjia722@ccmu.edu.cn

18

19 **Running title: Prevalence and Outcome of ACHD and CAD**

20 Word count: 3219 words

21 Figure: 2

22 Table: 3

1 **ABSTRACT**

2 **BACKGROUND** Little is known about the prevalence of outcome in patients with  
3 coronary artery disease (CAD) among adults with congenital heart disease (ACHD). The  
4 objectives of this study were to determine rates of ACHD and factors associated with  
5 outcomes among adults with CAD in a contemporary cohort within the China.

6 **METHODS** Using pragmatic data from the Prospective Registry of the Current Status of  
7 Care for Patients with Coronary Artery Disease database, between January and May 2022,  
8 we stratified all CAD patients with comorbid ACHD or not. Using logistic regression  
9 method, we explored the risk factors associated with lower risk of mortality and stroke. We  
10 constructed a matching sub-cohort as sensitive analysis.

11 **RESULTS** Of 10,517 evaluable patients 189 (1.8%) were with a diagnosis of ACHD, and  
12 were more female, more frequent with a history of atrial fibrillation, had a lower  
13 hemoglobin level at admission but less likely to have hypertension or smoking history than  
14 those without ACHD. In-hospital mortality before discharge was higher in patients with  
15 ACHD compared with no ACHD in the whole population (1.06% vs. 0.28%,  $p=0.05$ ) and  
16 matched population (1.06% vs. 0.13%,  $p=0.04$ ). Acute myocardial infarction (54.8%)  
17 represented the most common cause of death among all cohort, whereas 100% deaths  
18 among ACHD were due to ischemic stroke (2 cases).

19 **CONCLUSIONS** ACHD was associated with a higher rate of mortality, which stroke  
20 complications contribute most. Future studies are needed to improve the acknowledge of  
21 underlying stroke mechanisms and prognosis in this special population.

1 **KEY WORDS** Adult congenital heart disease; Coronary artery disease; Pragmatic registry;

2 In-hospital Outcome

## 1 INTRODUCTION

2 Given the success of modern cardiology care, congenital heart disease (CHD) has been  
3 transformed from a deadly condition into a treatable disorder, with an increasing need to  
4 deliver age-appropriate medical care<sup>1</sup>. Numerous studies have demonstrated that residual  
5 defects contribute substantially to long-term morbidity<sup>2-4</sup>. The current Guidelines for Adults  
6 with Congenital Heart Disease (ACHD) developed for general cardiologists and the  
7 community of ACHD specialists focusing on surgical and percutaneous interventions  
8 process<sup>5,6</sup>. However, somewhat surprising is the fact that recommendations have largely  
9 been classified as Class I with a level of evidence at B or C, indicating the mismatch  
10 between clinical needs and quality of supportive data<sup>5</sup>.

11 As a field which lags significantly behind other adult populations, specialized study  
12 performing on ACHD are warranted to generate comparable evidence to non-CHD  
13 population. In the present study, we aimed to provide a general overview of ACHD in the  
14 coronary artery disease (CAD) population using a pragmatic registry. We also aim to  
15 provide an outlook on the potential prognostic factors and outcomes in this population.

## 16 METHODS

### 17 Study design and patient selection

18 Data from the Prospective Registry of the Current Status of Care for Patients with Coronary  
19 Artery Disease database were used in the study. Launched on January 17th, 2022, the  
20 project (clinicaltrial.gov NCT 05337319) is a nationwide, pragmatic registry including  
21 patients with a principal discharge diagnosis of coronary artery disease (CAD). The registry

1 is a program of the National Clinical Research Center for Cardiovascular Disease in Beijing  
2 Anzhen hospital, focusing on quality improvement efforts for CAD care by routinely  
3 collected electronic health records. Briefly, the in-hospital patients were recruited  
4 consecutively in collaborative hospitals every month. Patient were eligible for enrollment  
5 with a principal discharge diagnosis of CAD, including ST elevated myocardial infarction,  
6 non-ST-segment elevation myocardial infarction, unstable angina pectoris, and stable  
7 coronary artery disease. The protocol was approved by the Ethics Committee of Beijing  
8 Anzhen Hospital, Capital Medical University.

9 Patient-level data including demographics, medical history, physical examination,  
10 laboratory findings, medical treatment, procedural details, and in-hospital outcomes were  
11 collected via electronic medical records (EMR) and death registry system databases.  
12 Diagnosis and procedural details were entered into the database by medical staffs and  
13 coded by trained data abstractors. Data quality including accuracy, completeness, and  
14 consistency was monitored monthly by the study management group. All consecutive  
15 in-hospital patients with CAD at discharge in the database between January 17th, 2022 and  
16 May 31th, 11023 were included in this study. Patients who were not older than 18 years  
17 were excluded from the analysis.

## 18 **Definitions of variables**

19 ICD-10 diagnosis codes and ICD-9-CM-3 procedural codes were utilized for variable  
20 collection<sup>7,8</sup>. CAD and CHD were defined in accordance with the guidelines published by  
21 the Chinese society of cardiology and recorded by doctors on original medical records<sup>9</sup>.  
22 Patients were considered to have CHD, such as atrial septal defect, ventricular septal defect,

1 or patent ductus arteriosus, if those had been documented in admission or detected by  
2 echocardiogram during hospitalization<sup>10</sup>. An estimated glomerular filtration rate lower than  
3 60 mL/min per 1.73 m<sup>2</sup> was defined as renal insufficiency. Patients were classified as  
4 ACHD group if they had firm evidence of ACHD during their hospitalization for treating  
5 CAD. Patients who were not recognized any congenital cardiac defect were defined as “no  
6 ACHD”.

### 7 **Endpoints**

8 The primary endpoint was in-hospital mortality. Cardiovascular death was defined as any  
9 death with a clear relationship to underlying coronary heart disease (including death,  
10 secondary to acute MI, sudden death, unobserved and unexpected death, resuscitated out of  
11 hospital cardiac arrest that does not survive to hospital discharge), stroke, and other death  
12 that cannot definitely be attributed to a non-CV cause. Stroke was defined as a new  
13 neurologic deficit during the index event hospitalization. Both ischemic and hemorrhagic  
14 stroke will be considered as an endpoint and differentiated into the 2 types of events.  
15 Pneumonia was defined as new documentation in the medical record based on supportive  
16 laboratory findings and radiologic evidence. All these endpoints were documented in  
17 medical records by clinical doctors during hospitalization.

### 18 **Statistical analysis**

19 Baseline characteristics and procedural details of included patients are described.  
20 Continuous variables are presented as mean and standard deviation (SD) if a normal  
21 distribution, and as a median and interquartile range (IQR) if skewed. Categorical variables

1 are presented as frequency and percentage. T-test or Kruskal-Wallis test for continuous  
2 variables, and Chi-square test for categorical variables were used to test for statistically  
3 significant differences between the ACHD versus No ACHD groups.

4 We used logistic regression method to explore the potential risk factors of endpoints.  
5 The univariate logistic models were built by each candidate that showed a significant  
6 difference between the ACHD and no ACHD groups. Odd ratios (OR) and 95% confidence  
7 intervals (CI) were calculated and reported.

8 Considering the unbalanced number of enrolled patients between two groups, we  
9 constructed a matching sub-cohort from this population to conduct the sensitive analysis. In  
10 detail, we used all ACHD patients as ‘cases’ and selected 4 ‘controls’ for each of them from  
11 the No ACHD patients randomly. Each control had a same age and sex with the matched  
12 case. We applied logistic models in this matched cohort to verify the association between  
13 potential risk factors and endpoints.

14 The reference was used as No ACHD group in all analyses. All tests were two-sided,  
15 and a  $p$  value of less than 0.05 was considered with statistical significance. All statistical  
16 analyses were performed by SAS version 9.4 (SAS Institute Inc; Cary, NC).

## 17 **RESULTS**

### 18 **Patient characteristics, treatments, and procedural details**

19 Up to May 31, 2022, a total of 11,023 patients with cleaned data were enrolled in the study.  
20 Based on the principal discharge diagnosis, 10,519 patients with CAD during the study  
21 period were identified. After excluding 2 patients younger than 18 years, 10,517 patients

1 were included in the study, of whom 189 (1.8%) were diagnosed with ACHD. The type of  
2 CHD in ACHD group is shown in **Figure 1**. 750 No ACHD patients were selected as  
3 controls (6 ACHD patients could only find 3 controls for each).

4 Patient baseline characteristics and procedural details were shown in **Table 1**. Patients  
5 with ACHD and CAD were more female, more frequent with a medical history of atrial  
6 fibrillation, and had a lower hemoglobin level at admission. However, they were less likely  
7 to have atherosclerotic cardiovascular disease (ASCVD) risk factors such as hypertension  
8 or smoking. 124 cases (65.6%) of atrial septal defect were the commonest comorbidity with  
9 CAD. In the matched cohort, baseline characteristics between the two groups were well  
10 balanced except for the history of hypertension (56.1% vs 67.1%,  $p<0.001$ ).

11 The most frequently used thromboprophylaxis for ACHD was anticoagulant, with  
12 weak antiplatelet therapy than no ACHD group. This drug discrimination was observed  
13 both at admission and discharge. The ACHD patients underwent CABG more frequently  
14 than the no ACHD group (14.3% vs 9.4%,  $p=0.02$ ), but less received PCI (29.1% vs 44.1%,  
15  $p<0.001$ ). Moreover, compared with no ACHD, the ACHD patients had a less frequent use  
16 of statin at discharge (74.6% vs 86.7%,  $p<0.001$ ). Similar results were found in the matched  
17 cohort.

### 18 **In-hospital clinical outcomes**

19 **Table 2** shows in-hospital outcomes in the two groups. In-hospital mortality before  
20 discharge was higher in patients with ACHD compared with no ACHD in the whole  
21 population (1.06% vs. 0.28%,  $p=0.05$ ) and matched population (1.06% vs. 0.13%,  $p=0.04$ ).  
22 The overall incidence of in-hospital cardiovascular death was 0.28% (29 cases); the



1 incidence of cardiovascular death was higher in patients with ACHD than in those without  
2 (1.06% vs. 0.26%;  $p=0.04$ ). Compared with no ACHD, ACHD group has an increased risk  
3 of in-hospital stroke (3.17% vs 0.93%,  $p<0.001$ ), ischemic stroke and intracerebral  
4 hemorrhage; while the difference in ischemic stroke was no longer significant in the  
5 matched population. The incidence of lung infection during hospitalization was similar in  
6 the two groups (0.53% vs. 0.44%,  $p=0.85$ ).

7 The causes of death are presented in **Figure 2**. The most common causes of death  
8 among all adults with CAD in the death cohort were acute myocardial infarction (54.8%),  
9 cardiac shock (12.9%) and cardiac arrest (9.6%). The 2 deaths among those with ACHD  
10 were due to ischemic stroke (100%).

### 11 **Risk factors of death and stroke**

12 In the logistic regression model including baseline characteristics with a statistically  
13 significant difference between groups, anemia at admission (OR: 4.57, 95% CI, 1.9–11.01),  
14 acute myocardial infarction (OR: 19.15, 95% CI, 8.77–41.82) were independent risk factors  
15 of mortality (**Table 3**). Whereas, the PCI intervention (OR: 0.38, 95% CI, 0.15–0.95) and  
16 CABG (OR: 19.15, 95% CI, 8.77–41.82) were identified as protectors of mortality.  
17 Compared with patients without ACHD, the risk of stroke markedly increased in patients  
18 with ACHD (OR: 2.89, 95% CI, 1.22–6.87). Moreover, the history of hypertension showed  
19 a strong association with in-hospital stroke (OR: 2.9, 95% CI, 1.74–4.83).

## 20 **DISCUSSION**

21 Among 10,517 hospitalized CAD patients in the real-world cohort who were analyzed in

1 this study, ACHD was associated with a higher rate of mortality driven by stroke  
2 complications. Furthermore, no differences were found between ACHD and no ACHD  
3 patients with regard to the risk of pneumonia.

4 Nowadays, the medical need in patients with CHD is shifted from survival to beyond  
5 survival<sup>11,12</sup>. Truly assessing the long-term impact of CHD is mandatory for people living  
6 with chronic conditions and their caregivers<sup>13</sup>. Whereas consideration and overcoming  
7 above mentioned challenges of the utmost importance in guidelines, comprehensive  
8 registries with contemporary CHD data are warrant<sup>11</sup>. In a retrospective, a single-center  
9 database of patient older than 40 year and patent foramen ovale (PFO) in Toronto, 180  
10 patients (84.9%) did concurrent coronary angiography with PFO disclosure<sup>14</sup>. A low  
11 prevalence of moderate-to-severe CAD (12.8%) was identified by coronary angiography  
12 and rare (0.6%) underwent concurrent angioplasty. A report from a standard adult  
13 cardiovascular center between April 2012 and August 2019, only 58 patients with the  
14 diagnosis of ACHD have been hospitalized<sup>15</sup>. Among them, only 6 (10.3%) were comorbid  
15 CAD. Lately, a national wide registry from Dutch demonstrated an increased CAD risk in  
16 ACHD patients compared to the general population, especially in youth but not in women  
17 older than 65 years or men older than 50 years<sup>16</sup>. However, these data cannot reach an  
18 established opinion regarding the accurate rate of comorbid CAD with ACHD, because of  
19 the diversity of the studied population. In our database using routine medical data sources,  
20 a real-world cohort of coronary artery disease, showed 1.8% CAD patients with ACHD. As  
21 the high incidence of mortality was observed in the ACHD and CAD population, which  
22 highlights the complexity mechanisms other than atherosclerosis contribute to the high

1 mortality associated with CHD in this population. Although our observational study might  
2 be influenced by potentially unmeasured confounding variables, the data including  
3 conversational, interventional, and surgical data shed light on this important remark.

4       Recently, a higher rate of recurrent ischemic events was observed in ACHD population,  
5 especially of neurocognitive complications<sup>17,18</sup>. Analysis from large cohort of adults with  
6 mild-to-moderate CHD of UK-biobank demonstrated measurable neurocognitive deficits.  
7 These findings indicated a transition cerebro- and cardiovascular process for CHD  
8 individuals moving from pediatric to adult<sup>18</sup>. In a patient-level pooled analysis of a  
9 randomized trial, young adults with cryptogenic strokes of undetermined source (ESUS)  
10 showed a low rate of recurrence stroke than older adults with ESUS<sup>4</sup>. Whereas PFO was  
11 detected in 50% of participants during follow-up, which may represent an incidental risk  
12 factor for stroke occurrence. Shah P, et al. systematic reviewed 386 cases with a thrombus  
13 straddling a PFO from 359 publications<sup>3</sup>. In their research, acute myocardial infarction but  
14 not ischemic stroke was associated with an 8-fold increased risk of in-hospital mortality.  
15 Analysis of individual patient data comprised of observational and randomized studies  
16 focused on PFO population. These results indicated atrial septal aneurysm as an important  
17 predictor of recurrent stroke, suggesting the need for risk stratification and procedural  
18 intervention in this population. In line with the previous studies, an increased rate of stroke  
19 was observed in ACHD group, suggesting the need for future studies to improve  
20 acknowledge of underlying stroke mechanisms in this special population. A priori, it may  
21 have been hypothesized that surgical impairment would reduce the rate of acute thrombotic  
22 complications which resulting ischemic events. The on-going trials (NCT03690518,

1 NCT04902768, NCT04288596) will provide firmer information on this question<sup>19</sup>.

2 In our study, comorbid ACHD and history of hypertension were associated with a  
3 higher rate of in-hospital stroke. A report from CHD centers in North Carolina from 2008 to  
4 2013 including 629 CHD patients dead with age at over 20 years, showed causes of death  
5 differed by lesion severity<sup>20</sup>. ACHD patients with severe lesions commonly died from  
6 underlying CHD, whereas those with non-severe CHD more commonly died from ischemic  
7 heart disease or malignancy. Hypertension and hyperlipidemia were prevalent at high rates  
8 among ACHD, indicating longitudinally medical care for ACHD should focus on  
9 traditional ASCVD risk factors. Latterly, Swedish National Patient Register identified  
10 17,189 ACHD patients and 180,131 matched controls describing the risk of myocardial  
11 infarction (MI) in ACHD<sup>21</sup>. In line with the national report, our data shows ACHD patients  
12 died commonly due to new-onset heart failure, or death after the index MI. Recognizing  
13 and managing the modifiable ASCVD risk factors are crucial to reduce morbidity and  
14 mortality in this special population. More detailed studies of these links are warranted to  
15 establish potential causality and pathogenesis ought to investigate the predictor and  
16 outcomes of ischemic event including MI or stroke in ACHD population.

17 Several important limitations of this study should be noted. Consisted with all  
18 observational studies, inherent limitations and residual confounding exist, our results  
19 should be considered as hypothesis-generating. Nevertheless, the study provides pragmatic  
20 data reflecting contemporary management in ACHD patients with CAD in China. Second,  
21 we did not include variables related to invasive extracorporeal circulation in the  
22 multivariable logistic regression models exploring the risk factor of stroke, because of

1 overfitting effect due to the small number of events. Third, we did not have detailed  
2 information on anticoagulation in the periprocedural period, which may represent a  
3 potential bias against the main objective of our study. Fourth, there were no follow-up data  
4 about the influence of stroke on mortality, disability, and quality of life. Despite the  
5 limitations, this is a pool of data picturing the view of ACHD in patients with CAD in the  
6 contemporary era.

## 7 **CONCLUSIONS**

8 Among CAD patients with comorbid ACHD, non-severe CHD was common and ACHD  
9 was associated with an increased risk of developing stroke or death. Longitudinal study on  
10 modifiable ASCVD risk factors in this special population are awaited.

## 11 **SOURCES OF FUNDING**

12 The prospective registry of the current status of care for patients with coronary artery  
13 disease has been funded by Beijing Anzhen hospital and National Clinical Research Center  
14 for Cardiovascular Diseases for quality improvement initiatives through an independent  
15 grant.

## 16 **CONFLICT OF INTEREST AND FINANCIAL DISCLOSURE STATEMENT**

17 Dr. Yan was funded by grants from the National Natural Science Foundation of China  
18 (82100260) and Beijing Hospitals Authority Youth Program (QML20210605). Dr. Li was  
19 funded by National Natural Science Foundation of China (82070483), Beijing Municipal  
20 Administration of Hospitals Clinical Medicine Development of Special Funding Support

1 (XMLX202107), Beijing Municipal Commission of Education (KM202110025014),  
2 Beijing Municipal Science and Technology Commission (Z211100002921010). The other  
3 authors have no conflicts of interest to declare.

#### 4 **CONTRIBUTION**

5 HL and YY contributed to the manuscript draft and analysis; YY, SQ and HZ contributed to  
6 the manuscript development; SW, YX and HZ were responsible for overseeing and  
7 monitoring the implementation of the registry; all authors critically reviewed the  
8 manuscript and approved the final version.

9

## 1 REFERENCES

- 2 1. Bredy C, Ministeri M, Kempny A, et al. New York Heart Association (NYHA)  
3 classification in adults with congenital heart disease: relation to objective measures of  
4 exercise and outcome. *Eur Heart J Qual Care Clin Outcomes* 2018;4:51-8.
- 5 2. Scott M, Neal AE. Congenital Heart Disease. *Prim Care* 2021;48:351-66.
- 6 3. Shah P, Jimenez-Ruiz A, Gibson A, et al. Association between acute myocardial  
7 infarction and death in 386 patients with a thrombus straddling a patent foramen  
8 ovale. *International journal of cardiology* 2021;342:1-6.
- 9 4. Perera KS, de Sa Boasquevisque D, Rao-Melacini P, et al. Evaluating Rates of  
10 Recurrent Ischemic Stroke Among Young Adults With Embolic Stroke of  
11 Undetermined Source: The Young ESUS Longitudinal Cohort Study. *JAMA Neurol*  
12 2022;79:450-8.
- 13 5. Marelli A, Beaulac L, Colman J, et al. Canadian Cardiovascular Society 2022  
14 Guidelines for Cardiovascular Interventions in Adults With Congenital Heart Disease.  
15 *Can J Cardiol* 2022;38:862-96.
- 16 6. Stout KK, Daniels CJ, Aboulhosn JA, et al. 2018 AHA/ACC Guideline for the  
17 Management of Adults With Congenital Heart Disease: A Report of the American  
18 College of Cardiology/American Heart Association Task Force on Clinical Practice  
19 Guidelines. *Circulation* 2019;139:e698-e800.
- 20 7. Rockower SJ. ICD-10: how did we get here, or what are we doing? *Md Med*  
21 2014;15:12-3.
- 22 8. Wang D, Wu ZQ, Wang W, et al. [Comprehensive analysis of unplanned abdominal -  
23 pelvic reoperations in Peking University Cancer Hospital and Institute from 2008 to  
24 2018]. *Zhonghua Wei Chang Wai Ke Za Zhi* 2019;22:869-75.
- 25 9. Chinese Cardiovascular Society 2021 Guidelines for Cardiovascular Interventions in  
26 Congenital Heart Disease, *Zhonghua Yixue Za Zhi*, 2021,101(38) : 3054-3076.
- 27 10. Writing G, Sachdeva R, Valente AM, et al.  
28 ACC/AHA/ASE/HRS/ISACHD/SCAI/SCCT/SCMR/SOPE 2020 Appropriate Use  
29 Criteria for Multimodality Imaging During the Follow-Up Care of Patients With

- 1 Congenital Heart Disease: A Report of the American College of Cardiology Solution  
2 Set Oversight Committee and Appropriate Use Criteria Task Force, American Heart  
3 Association, American Society of Echocardiography, Heart Rhythm Society,  
4 International Society for Adult Congenital Heart Disease, Society for Cardiovascular  
5 Angiography and Interventions, Society of Cardiovascular Computed Tomography,  
6 Society for Cardiovascular Magnetic Resonance, and Society of Pediatric  
7 Echocardiography. *J Am Soc Echocardiogr* 2020;33:e1-e48.
- 8 11. Baumgartner H, De Backer J, Babu-Narayan SV, et al. 2020 ESC Guidelines for the  
9 management of adult congenital heart disease. *European heart journal*  
10 2021;42:563-645.
- 11 12. Chessa M, Brida M, Gatzoulis MA, et al. Emergency department management of  
12 patients with adult congenital heart disease: a consensus paper from the ESC Working  
13 Group on Adult Congenital Heart Disease, the European Society for Emergency  
14 Medicine (EUSEM), the European Association for Cardio-Thoracic Surgery  
15 (EACTS), and the Association for Acute Cardiovascular Care (ACVC). *European*  
16 *heart journal* 2021;42:2527-35.
- 17 13. Warnes CA. Adult congenital heart disease: the challenges of a lifetime. *European*  
18 *heart journal* 2017;38:2041-7.
- 19 14. Frankfurter C, Muthuppalaniappan AM, Gorocica-Romero R, et al. Coronary Artery  
20 Disease in Adults Undergoing Percutaneous Patent Foramen Ovale Closure  
21 Following Cryptogenic Stroke. *J Invasive Cardiol* 2021;33:E870-E6.
- 22 15. Toyoda S, Sakuma M, Abe S, Nakajima T, Inoue T. Coronary artery disease in  
23 patients with adult congenital heart disease. *International journal of cardiology*  
24 2020;304:35-6.
- 25 16. Kuijpers JM, Vaartjes I, Bokma JP, et al. Risk of coronary artery disease in adults  
26 with congenital heart disease: A comparison with the general population.  
27 *International journal of cardiology* 2020;304:39-42.
- 28 17. Wang T, Chen L, Yang T, et al. Congenital Heart Disease and Risk of Cardiovascular  
29 Disease: A Meta-Analysis of Cohort Studies. *Journal of the American Heart*  
30 *Association* 2019;8:e012030.



- 1 18. Perrotta ML, Saha P, Zawadzki R, et al. Adults With Mild-to-Moderate Congenital  
2 Heart Disease Demonstrate Measurable Neurocognitive Deficits. *Journal of the*  
3 *American Heart Association* 2020;9:e015379.
- 4 19. Amedro P, Gavotto A, Legendre A, et al. Impact of a centre and home-based cardiac  
5 rehabilitation program on the quality of life of teenagers and young adults with  
6 congenital heart disease: The QUALI-REHAB study rationale, design and methods.  
7 *International journal of cardiology* 2019;283:112-8.
- 8 20. Goldstein SA, D'Ottavio A, Spears T, et al. Causes of Death and Cardiovascular  
9 Comorbidities in Adults With Congenital Heart Disease. *J Am Heart Assoc*  
10 2020;9:e016400.
- 11 21. Fedchenko M, Mandalenakis Z, Giang KW, Rosengren A, Eriksson P, Dellborg M.  
12 Long-term outcomes after myocardial infarction in middle-aged and older patients  
13 with congenital heart disease-a nationwide study. *Eur Heart J* 2021;42:2577-86.  
14  
15

1 **FIGURE LEGENDS**

2 Figure 1

3 Type of CHD in ACHD group.

4 CHD, congenital heart disease; ACHD, congenital heart disease

5

6 Figure 2

7 Causes of death among study cohort.

8 ACHD, congenital heart disease

9

Figure 1. Type of CHD in ACHD group

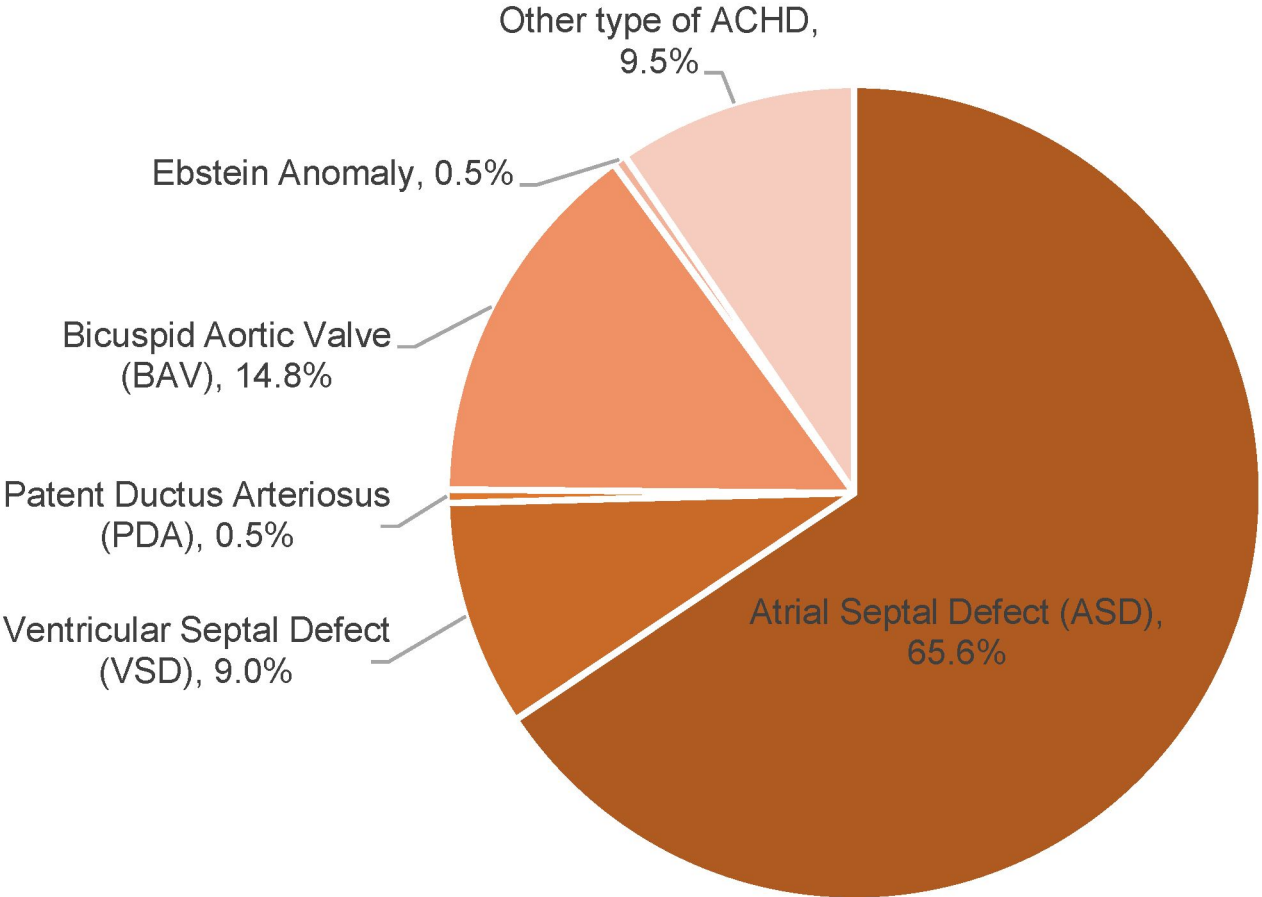

Figure 2. Causes of death among study cohort

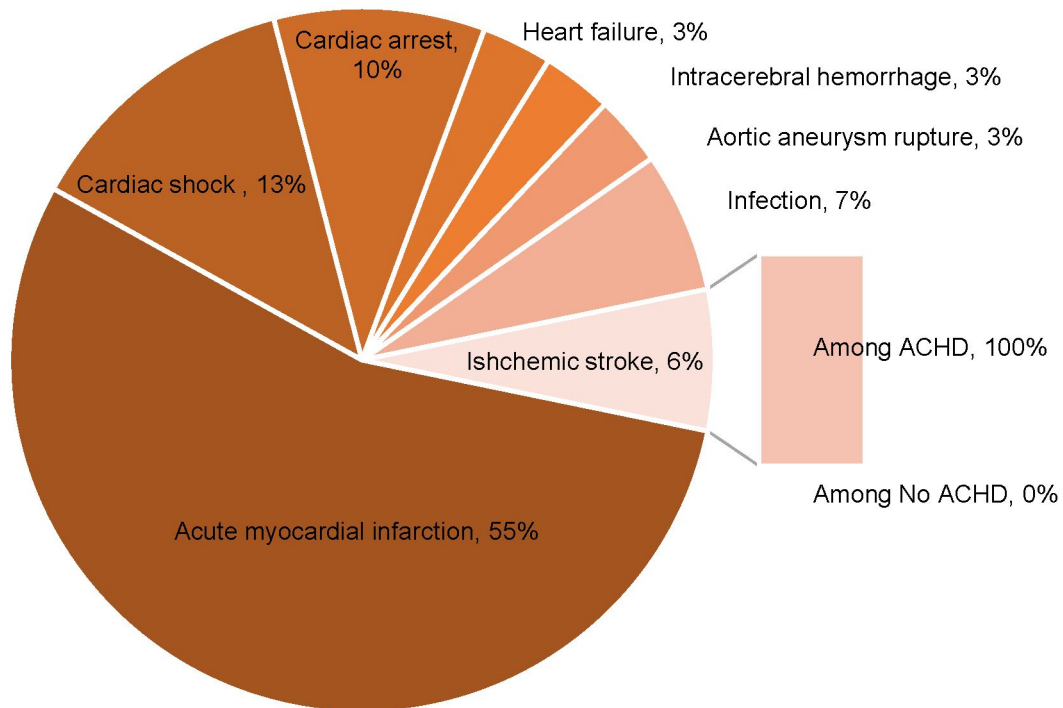

**Table 1. Baseline Characteristics and treatments**

| Variables                               | Whole Population  |                         |         | Matched Population |                      |         |
|-----------------------------------------|-------------------|-------------------------|---------|--------------------|----------------------|---------|
|                                         | ACHD<br>(n = 189) | No ACHD<br>(n = 10,328) | p value | ACHD<br>(n = 189)  | No ACHD<br>(n = 750) | p value |
| <b>Socio-demographic</b>                |                   |                         |         |                    |                      |         |
| Age, median (Q1, Q3), years             | 63 (54, 69)       | 62 (55, 68)             | 0.49    | 63 (54, 69)        | 64 (54, 69)          | 0.87    |
| Age $\geq$ 75 years                     | 19 (10.1)         | 750 (7.3)               | 0.14    | 19 (10.1)          | 76 (10.1)            | 0.97    |
| Female                                  | 75 (39.7)         | 2908 (28.2)             | <0.001  | 75 (39.7)          | 297 (39.6)           | 0.98    |
| Married                                 | 175 (92.6)        | 9504 (92.0)             | 0.77    | 175 (92.6)         | 684 (91.2)           | 0.54    |
| Medical insurance                       | 186 (98.4)        | 10259 (99.3)            | 0.13    | 186 (98.4)         | 746 (99.5)           | 0.13    |
| <b>Medical history and risk factors</b> |                   |                         |         |                    |                      |         |
| Previous MI                             | 19 (10.1)         | 1165 (11.3)             | 0.6     | 19 (10.1)          | 73 (9.7)             | 0.89    |

|                                       |            |             |      |            |            |        |
|---------------------------------------|------------|-------------|------|------------|------------|--------|
| Previous PCI                          | 44 (23.3)  | 2743 (26.6) | 0.31 | 44 (23.28) | 189 (25.2) | 0.59   |
| Previous CABG                         | 4 (2.1)    | 206 (2)     | 0.91 | 4 (2.12)   | 16 (2.13)  | 0.99   |
| Hypertension                          | 106 (56.1) | 6655 (64.4) | 0.02 | 106 (56.1) | 503 (67.1) | <0.001 |
| Dyslipidemia                          | 89 (47.1)  | 5175 (50.1) | 0.41 | 89 (47.1)  | 386 (51.5) | 0.28   |
| Diabetes mellitus                     | 59 (31.2)  | 3627 (35.1) | 0.27 | 59 (31.2)  | 266 (35.5) | 0.27   |
| Renal failure history                 | 19 (10.1)  | 804 (7.8)   | 0.25 | 19 (10.1)  | 61 (8.1)   | 0.4    |
| Heart failure history                 | 9 (4.8)    | 461 (4.5)   | 0.84 | 9 (4.8)    | 25 (3.3)   | 0.35   |
| Stroke                                | 15 (7.9)   | 924 (9.0)   | 0.63 | 15 (7.9)   | 78 (10.4)  | 0.31   |
| Atrial fibrillation                   | 6 (3.2)    | 142 (1.4)   | 0.04 | 6 (3.2)    | 11 (1.5)   | 0.12   |
| Chronic obstructive pulmonary disease | 1 (0.5)    | 53 (0.5)    | 0.98 | 1 (0.5)    | 2 (0.3)    | 0.57   |
| Pacemaker or defibrillator            | 2 (1.1)    | 113 (1.1)   | 0.96 | 2 (1.1)    | 7 (0.9)    | 0.87   |
| Smoking                               | 69 (36.5)  | 4613 (44.7) | 0.03 | 69 (36.5)  | 289 (38.5) | 0.61   |
| Alcohol                               | 48 (25.4)  | 2987 (28.9) | 0.29 | 48 (25.4)  | 193 (25.7) | 0.92   |

**Clinical status at admission**

|                                                |                   |                   |      |                   |                   |      |
|------------------------------------------------|-------------------|-------------------|------|-------------------|-------------------|------|
| Acute myocardial infarction                    | 18 (9.5)          | 1225 (11.9)       | 0.32 | 18 (9.5)          | 86 (11.5)         | 0.45 |
| Hemoglobin, median (Q1, Q3), g/L               | 134 (120, 147)    | 139 (126, 150)    | 0.01 | 134 (120, 147)    | 137 (123, 147)    | 0.36 |
| Creatinine, median (Q1, Q3), $\mu\text{mol/L}$ | 76.7 (65.3, 94.1) | 76.5 (66.4, 88.2) | 0.61 | 76.7 (65.3, 94.1) | 74.5 (64.2, 87.5) | 0.12 |
| LVEF, median (Q1, Q3), %                       | 63 (60, 66)       | 63 (60, 66)       | 0.97 | 63 (60, 66)       | 64 (60, 66)       | 0.24 |

**Medical treatment at admission**

|                              |           |             |        |           |            |        |
|------------------------------|-----------|-------------|--------|-----------|------------|--------|
| Aspirin                      | 83 (43.9) | 6311 (61.1) | <0.001 | 83 (43.9) | 446 (59.5) | <0.001 |
| P2Y <sub>12</sub> inhibitors | 94 (49.7) | 7304 (70.7) | <0.001 | 94 (49.7) | 513 (68.4) | <0.001 |
| Anticoagulants               | 18 (9.5)  | 209 (2)     | <0.001 | 18 (9.5)  | 20 (2.7)   | <0.001 |
| $\beta$ blocker              | 6 (3.2)   | 384 (3.7)   | 0.7    | 6 (3.2)   | 28 (3.7)   | 0.71   |
| Diuretics                    | 3 (1.6)   | 125 (1.2)   | 0.64   | 3 (1.6)   | 7 (0.9)    | 0.43   |

**Procedural details**

|             |            |             |        |            |            |        |
|-------------|------------|-------------|--------|------------|------------|--------|
| Angiography | 126 (66.7) | 8454 (81.9) | <0.001 | 126 (66.7) | 604 (80.5) | <0.001 |
|-------------|------------|-------------|--------|------------|------------|--------|

|                                              |            |             |        |            |            |        |
|----------------------------------------------|------------|-------------|--------|------------|------------|--------|
| PCI intervention                             | 55 (29.1)  | 4552 (44.1) | <0.001 | 55 (29.1)  | 301 (40.1) | 0.01   |
| CABG                                         | 27 (14.3)  | 972 (9.4)   | 0.02   | 27 (14.3)  | 62 (8.3)   | 0.01   |
| <b>Medication at discharge</b>               |            |             |        |            |            |        |
| Aspirin                                      | 137 (72.5) | 9115 (88.3) | <0.001 | 137 (72.5) | 644 (85.9) | <0.001 |
| Clopidogrel                                  | 77 (40.7)  | 5319 (51.5) | <0.001 | 77 (40.7)  | 365 (48.7) | 0.05   |
| Ticagrelor                                   | 30 (15.9)  | 2513 (24.3) | 0.01   | 30 (15.9)  | 171 (22.8) | 0.04   |
| OAC                                          | 32 (16.9)  | 457 (4.4)   | <0.001 | 32 (16.9)  | 45 (6)     | <0.001 |
| $\beta$ blocker                              | 100 (52.9) | 6227 (60.3) | 0.04   | 100 (52.9) | 457 (60.9) | 0.04   |
| ACEI/ ARB                                    | 73 (38.6)  | 4028 (39)   | 0.92   | 73 (38.6)  | 308 (41.1) | 0.54   |
| Statin                                       | 155 (82)   | 9356 (90.6) | <0.001 | 155 (82)   | 678 (90.4) | <0.001 |
| Duration of hospitalization, median (Q1, Q3) | 3 (2, 6)   | 3 (2, 5)    | 0.21   | 3 (2, 6)   | 3 (2, 5)   | 0.01   |

Values are numbers (percentages) unless otherwise indicated. Percentages may not sum to 100 due to rounding.

MI, myocardial infarction; PCI, primary percutaneous coronary intervention; CABG, coronary artery bypass grafting; LVEF, left ventricular ejection fraction



**Table 2. Incidence of In-hospital Clinical Outcomes between study groups**

| Outcomes                 | Whole population  |                         |         | Matched population |                      |         |
|--------------------------|-------------------|-------------------------|---------|--------------------|----------------------|---------|
|                          | ACHD<br>(n = 189) | No ACHD<br>(n = 10,328) | p value | ACHD<br>(n = 189)  | No ACHD<br>(n = 750) | p value |
| Death                    | 2 (1.06)          | 29 (0.28)               | 0.05    | 2 (1.06)           | 1 (0.13)             | 0.04    |
| Cardiovascular death     | 2 (1.06)          | 27 (0.26)               | 0.04    | 2 (1.06)           | 1 (0.13)             | 0.04    |
| Stroke                   | 6 (3.17)          | 96 (0.93)               | <0.001  | 6 (3.17)           | 9 (1.2)              | 0.05    |
| Ischemic stroke          | 5 (2.65)          | 93 (0.9)                | 0.01    | 5 (2.65)           | 9 (1.2)              | 0.14    |
| Intracerebral hemorrhage | 1 (0.53)          | 3 (0.03)                | <0.001  | 1 (0.53)           | 0 (0)                | 0.05    |
| Pneumonia                | 1 (0.53)          | 45 (0.44)               | 0.85    | 1 (0.53)           | 2 (0.27)             | 0.57    |

**Table 3. Risk factors of death and stroke**

|                             | Death              |         | Stroke           |         |
|-----------------------------|--------------------|---------|------------------|---------|
|                             | OR (95% CI)        | p value | OR (95% CI)      | p value |
| ACHD                        | 3.03 (0.65–14.13)  | 0.16    | 2.89 (1.22–6.87) | 0.02    |
| Female                      | 1.23 (0.47–3.25)   | 0.67    | 1.25 (0.77–2.01) | 0.36    |
| Anemia at admission         | 4.57 (1.9–11.01)   | <0.001  | 1.08 (0.62–1.89) | 0.78    |
| Smoking                     | 1.6 (0.65–3.94)    | 0.3     | 0.74 (0.45–1.2)  | 0.22    |
| Hypertension                | 1.98 (0.85–4.57)   | 0.11    | 2.9 (1.74–4.83)  | <0.001  |
| Atrial fibrillation         | 2.81 (0.36–21.73)  | 0.32    | N/A              | N/A     |
| Acute myocardial infarction | 19.15 (8.77–41.82) | <0.001  | 1.44 (0.78–2.69) | 0.24    |
| PCI intervention            | 0.38 (0.15–0.95)   | 0.04    | 0.32 (0.17–0.59) | <0.001  |
| CABG                        | 0.14 (0.04–0.5)    | 0.002   | 1.09 (0.58–2.04) | 0.78    |

PCI, primary percutaneous coronary intervention; CABG, coronary artery bypass grafting
